# Supplementary material for: Age, sex and Alzheimer’s disease: a longitudinal study of 3xTg-AD mice reveals sex-specific disease trajectories and inflammatory responses mirrored in postmortem brains from Alzheimer’s patients
Source: PubMed Central journal article supplement (PMC11193202; doi:10.1186/s13195-024-01492-x), 2024-06-22

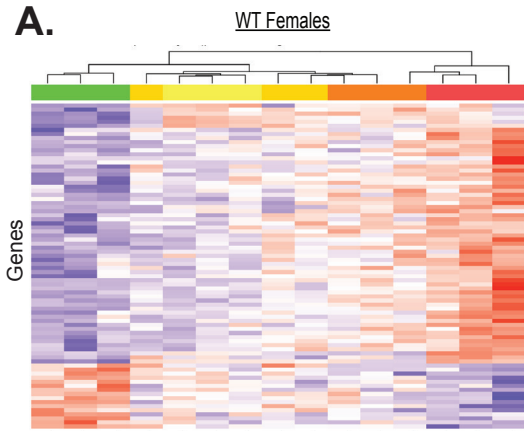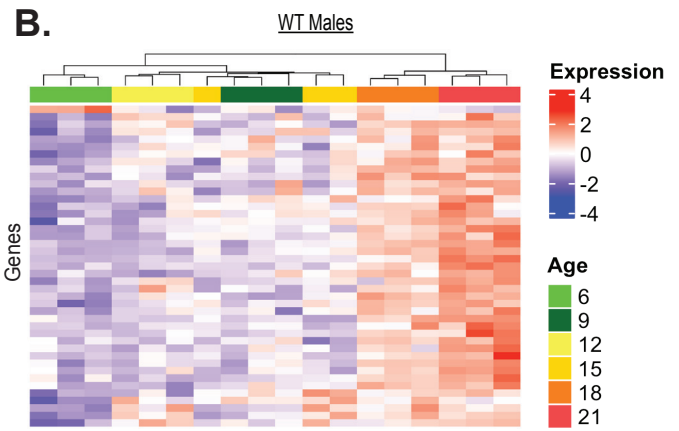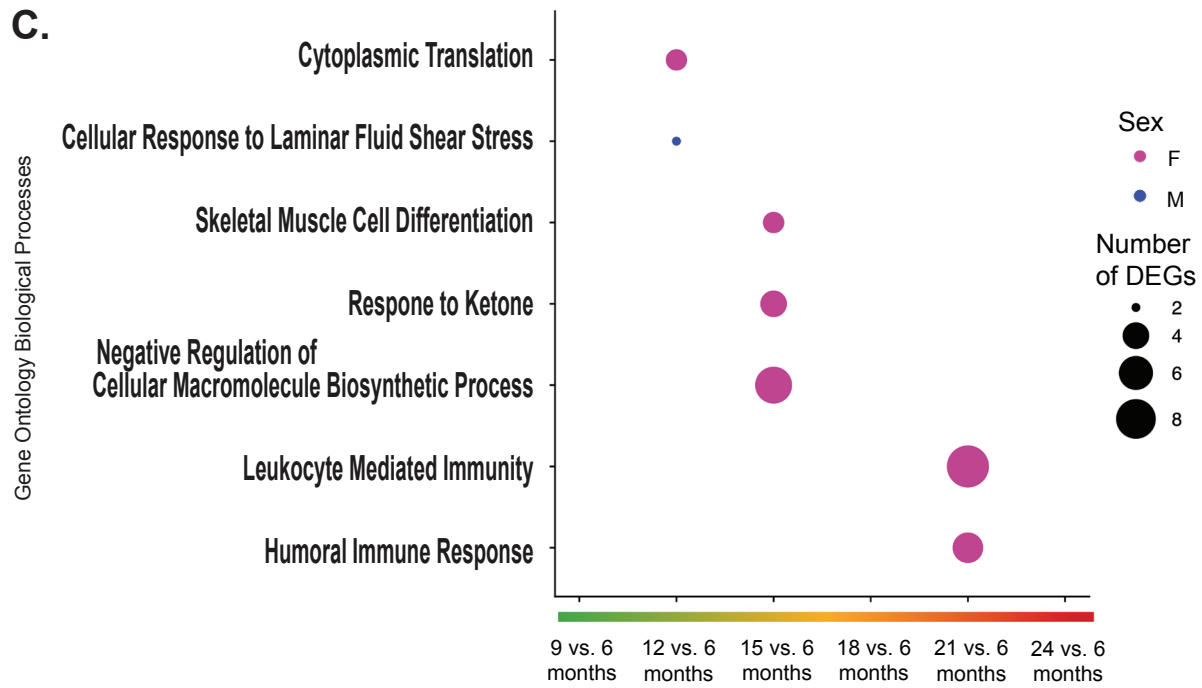

Supplement: 13195_2024_1492_MOESM9_ESM.pdf [file 13195_2024_1492_MOESM9_ESM.pdf]
